# Supplementary material for: Electron cryo-tomography reveals the subcellular architecture of growing axons in human brain organoids
Source: eLife. 2021 Oct 26;10:e70269. doi: 10.7554/eLife.70269 (PMC8547956; doi:10.7554/eLife.70269)
Supplement: Supplementary file 1. [file elife-70269-supp1.xlsx]

## Sheet: EMPIAR-10806
Name in Figure 2 - figure supplement 2	Tilt series name in EMPIAR dataset 10806	Date of tilt series acquisition
fGFP_TS1	g9_MMM1_TS1	2019-11-02
fGFP_TS2	g9_MMM5_TS5	2019-11-02
fGFP_TS3	g9_MMM8_TS2	2019-11-02
fGFP_TS4	g9_MMM11_TS4	2019-11-02
fGFP_TS15	g7_TS1	2019-05-30
fGFP_TS16	g7_TS2	2019-05-30
fGFP_TS10	g7_TS3	2019-05-30
fGFP_TS11	g7_TS4	2019-05-31
fGFP_TS12	g7_TS5	2019-05-31
fGFP_TS17	g7_TS6	2019-05-31
fGFP_TS18	g7_TS7	2019-05-31
fGFP_TS13	g7_TS8	2019-05-31
fGFP_TS14	g7_TS9	2019-05-31
fGFP_TS19	g4_MMM1_TS1	2018-11-06
fGFP_TS20	g4_MMM1_TS2	2018-11-06
fGFP_TS21	g4_MMM1_TS3	2018-11-06
fGFP_TS22	g4_MMM1_TS4	2018-11-06
fGFP_TS8	g4_MMM6_TS1	2018-11-05
fGFP_TS9	g4_MMM6_TS2	2018-11-05
fGFP_TS5	g4_MMM7_TS1	2018-11-05
fGFP_TS6	g4_MMM7_TS2	2018-11-05
fGFP_TS7	g4_MMM7_TS3	2018-11-05

## Sheet: EMPIAR-10805
Name in Figure 2 - figure supplement 3	Tilt series name in EMPIAR dataset 10805	Date of tilt series acquisition
hL1CAM TS1	g4_MMM1_TS1	2019-10-08
hL1CAM TS2	g4_MMM1_TS2	2019-10-09
hL1CAM TS3	g4_MMM1_TS3	2019-10-09
hL1CAM TS4	g4_MMM1_TS4	2019-10-09
hL1CAM TS5	g4_MMM1_TS5	2019-10-09
hL1CAM TS6	g3_MMM1_TS1	2019-10-08
hL1CAM TS7	g3_MMM1_TS2	2019-10-08
hL1CAM TS8	g4_MMM2_TS7	2019-10-09

## Sheet: EMPIAR-10804
Name in Figure 2 - figure supplement 4	Tilt series name in EMPIAR dataset 10804	Date of tilt series acquisition
ESYT1_TS1	g5_MMM1_TS1	2019-12-17
ESYT1_TS2	g5_MMM1_TS2	2019-12-17
ESYT1_TS3	g5_MMM1_TS3	2019-12-17
ESYT1_TS4	g5_MMM1_TS4	2019-12-17
ESYT1_TS5	g5_MMM1_TS5	2019-12-17
ESYT1_TS6	g6_MMM4_TS2	2019-12-17
ESYT1_TS7	g6_MMM1_TS3	2019-12-18
ESYT1_TS8	g6_MMM1_TS4	2019-12-18
ESYT1_TS9	g6_MMM5_TS6	2019-12-18
ESYT1_TS10	g6_MMM3_TS7	2019-12-18

## Sheet: README
The original data were acquired in multiple microscope sessions. For simplicity the original tilt series have been renamed and numbered for each individual data set. The file here contains the original name of each tilt series as acquired and as uploaded for the EMPIAR data sets 10806, 10805 and 10806, and the corresponding name of each tilt series as presented in Figure 2 - figure supplement 2, …
